# Supplementary material for: Cancer Cells Upregulate Tau to Gain Resistance to DNA Damaging Agents
Source: MDPI journal article supplement (doi:10.3390/cancers15010116), 2022-12-24
Supplement: s1 [file s1]

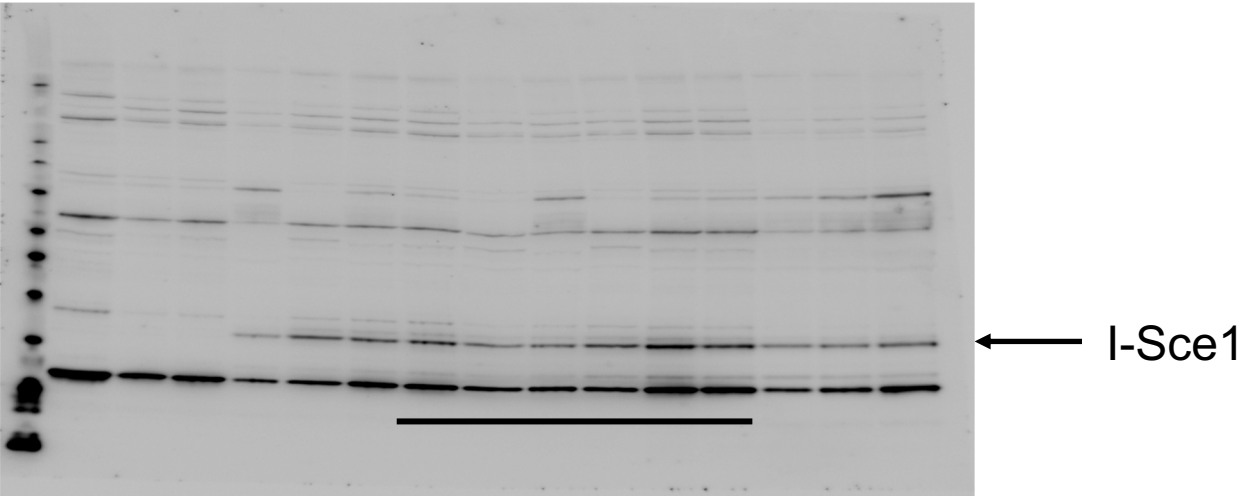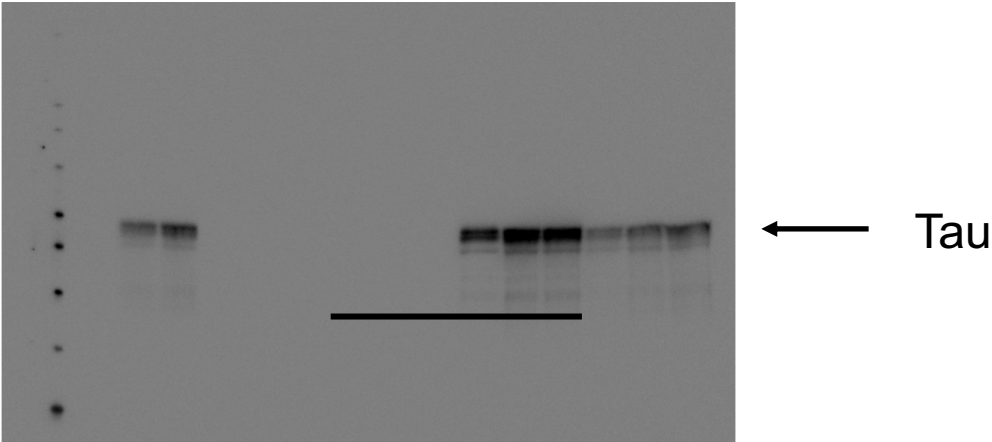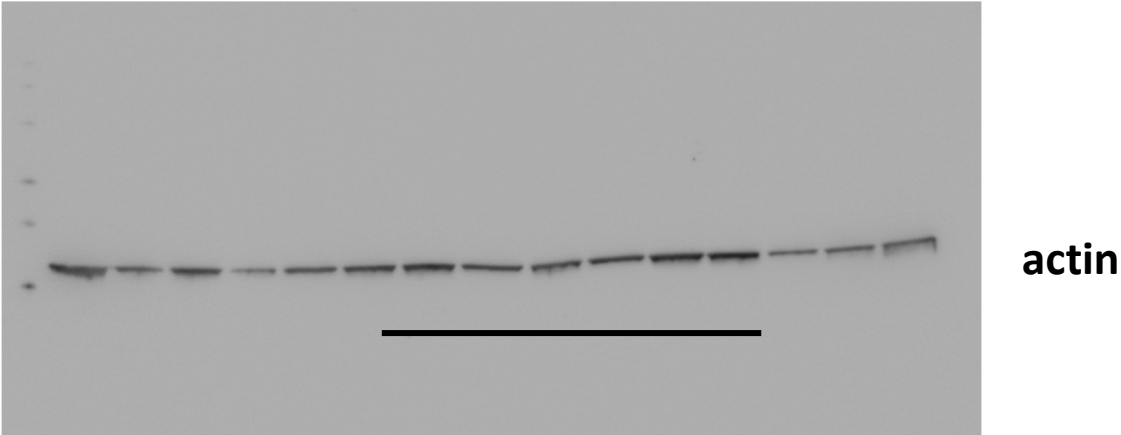

**FIGURE 3B**

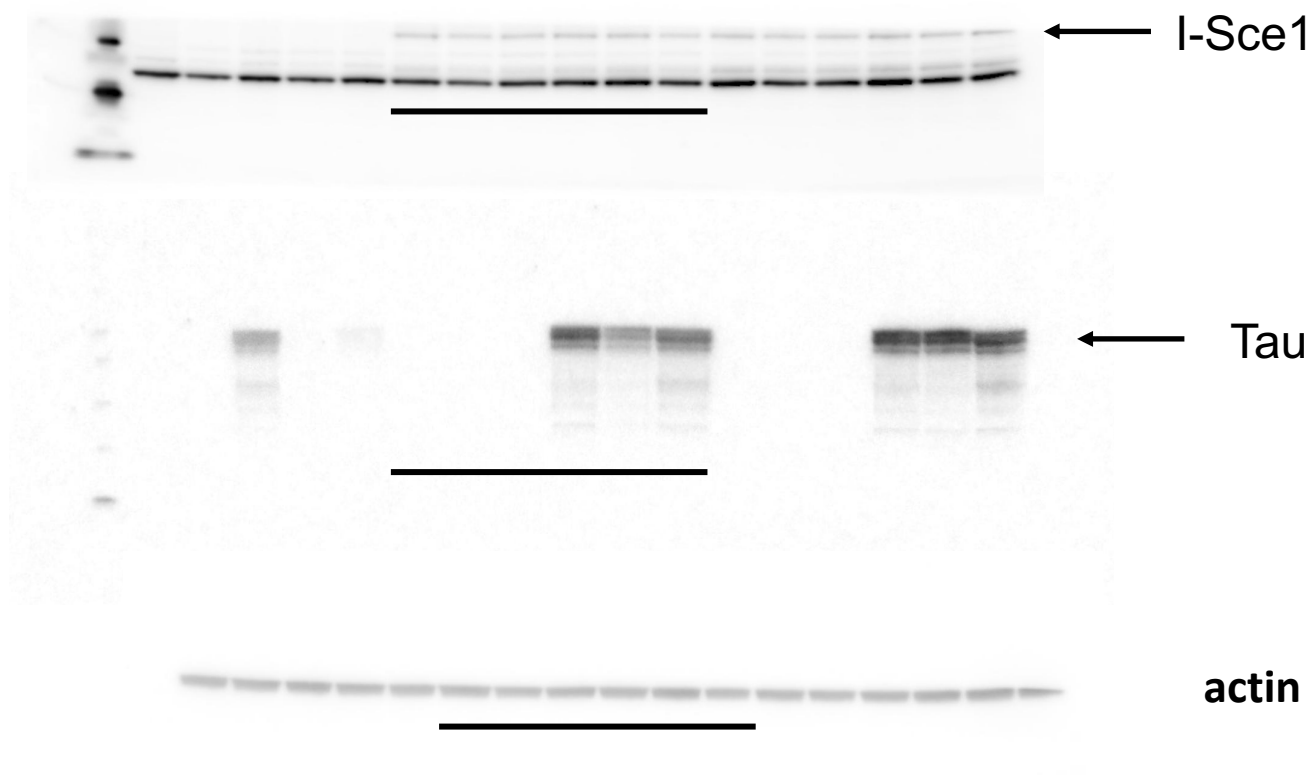

**FIGURE 3E**

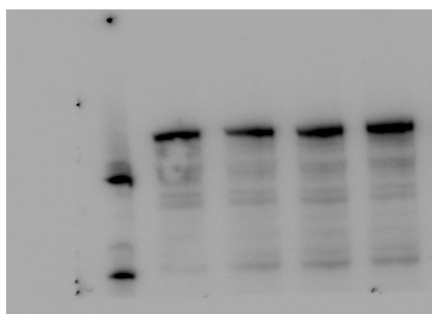

**53BP1**  
**(total extraction)**

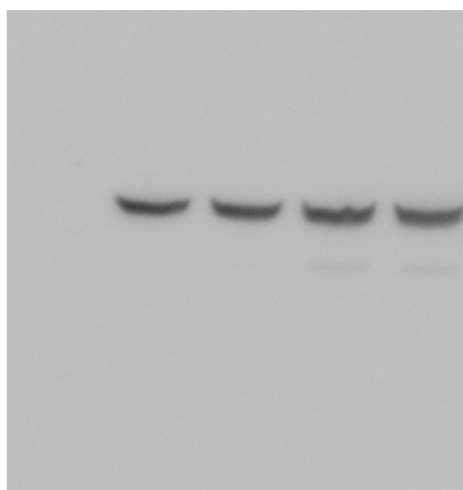

**Hsp90**  
**(total extraction)**

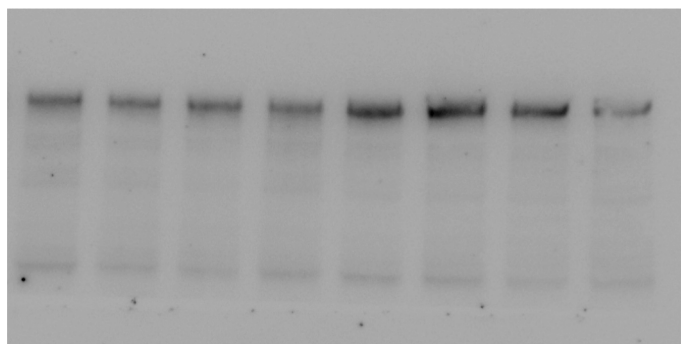

**53BP1**  
**(fractionation)**

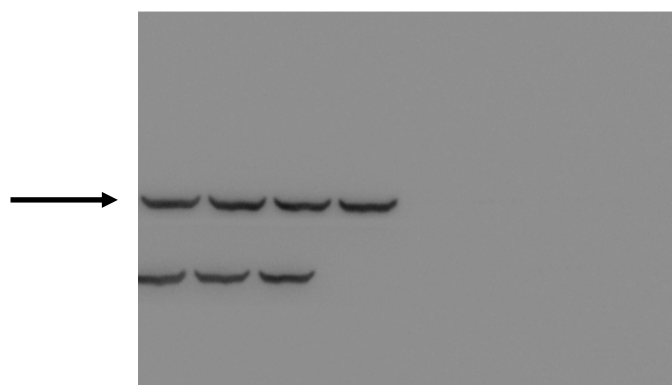

**Hsp90**  
**(fractionation)**

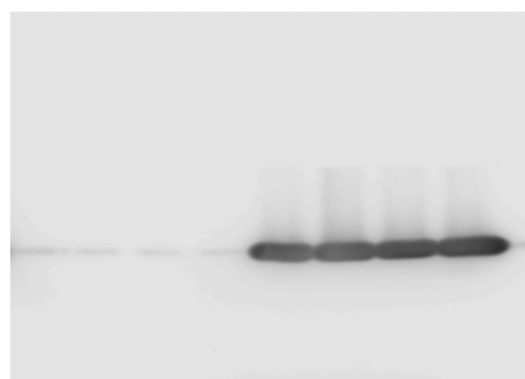

**H3**  
**(fractionation)**

**FIGURE 5C**

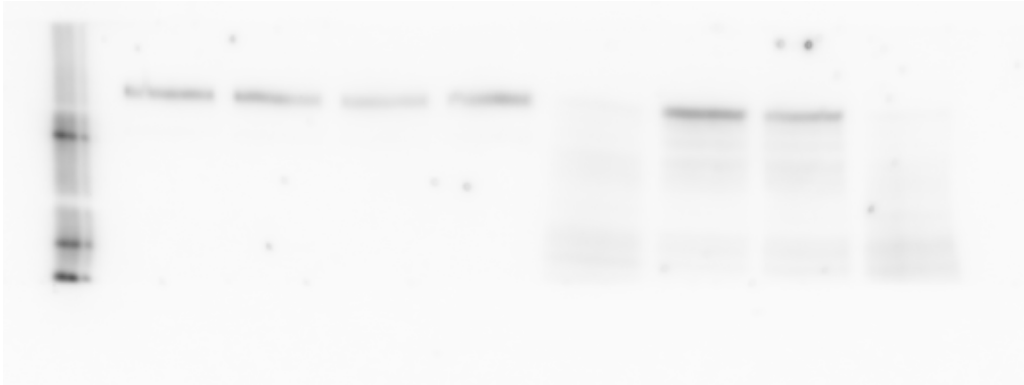

**53BP1**

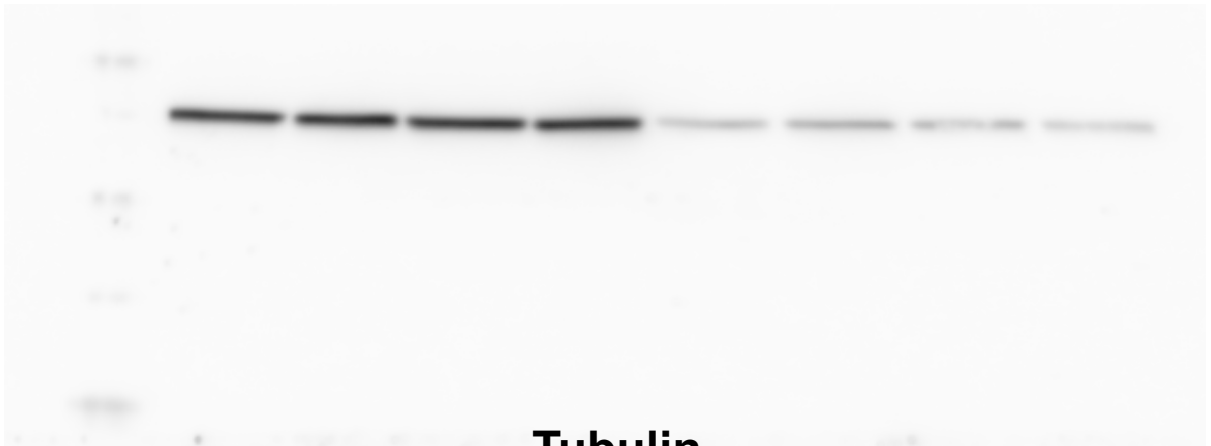

**Tubulin**

**FIGURE 6A**
